# Supplementary material for: A single rapid route for the synthesis of reduced graphene oxide with antibacterial activities
Source: Royal Society of Chemistry journal article supplement (doi:10.1039/c3ra47573e), 2014-01-01
Supplement: c3ra47573e1.pdf [file c3ra47573e1.pdf]

Electronic Supplementary Information (ESI)

## A single rapid route for the synthesis of reduced graphene oxide with antibacterial activities

Suela Kellici,<sup>a\*</sup> John Acord,<sup>a</sup> Jeremy Ball,<sup>b</sup> Haricharan S. Reehal,<sup>b</sup> David Morgan<sup>c</sup> and Basudeb Saha<sup>a\*</sup>

### XPS DATA

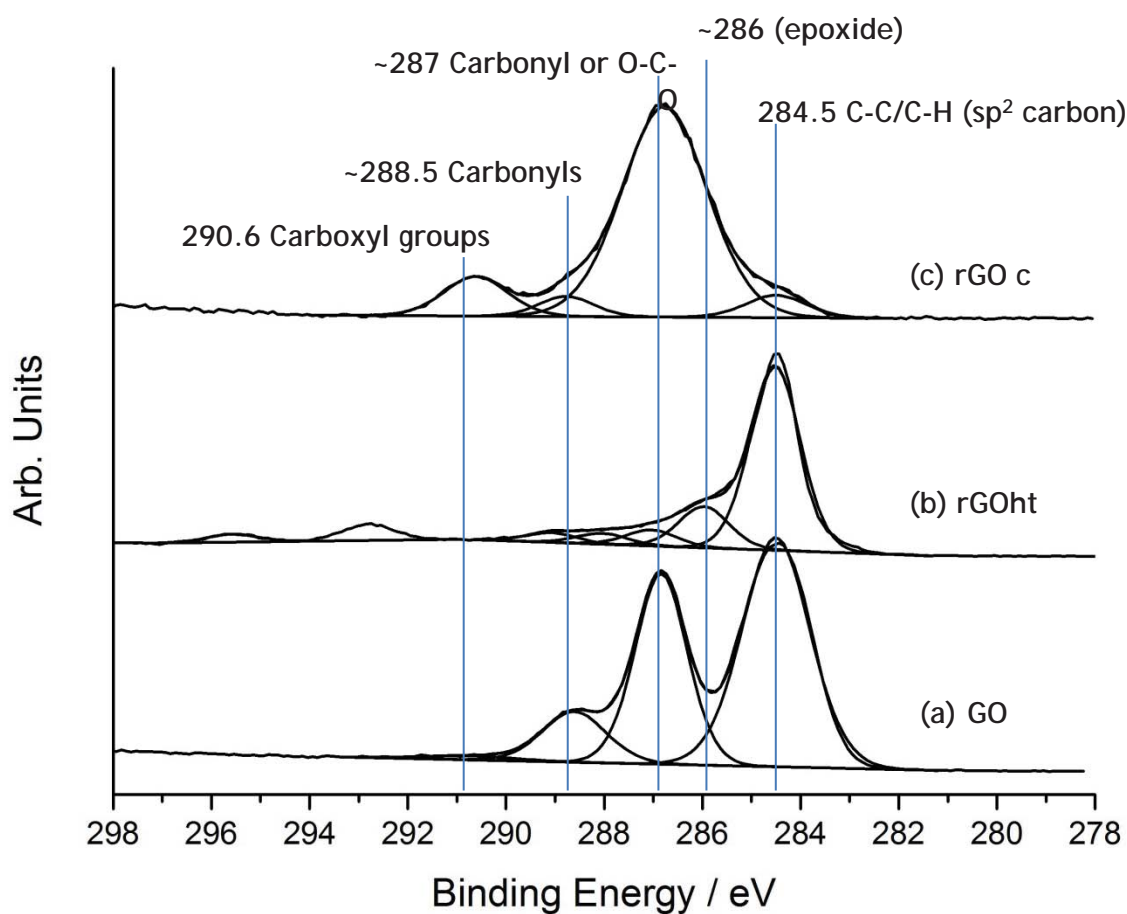

**Fig. S1.** XPS spectra of (a) graphene oxide (GO), (b) reduced graphene oxide material (rGOht) synthesised *via* continuous hydrothermal process and (c) reduced graphene oxide synthesised using conventional method (rGOc).

**Table S1. Atomic composition data from XPS analysis**

| Data Set     | Name  | %At Conc |
|--------------|-------|----------|
| <b>GO</b>    | O 1s  | 27.23    |
|              | C 1s  | 70.78    |
|              | N 1s  | 0.80     |
|              | F 1s  | 0.74     |
|              | S 2p  | 0.30     |
|              | Cl 2p | 0.15     |
|              |       |          |
| <b>rGOht</b> | O 1s  | 17.89    |
|              | C 1s  | 78.96    |
|              | Cl 2p | 0.19     |
|              | K 2s  | 2.96     |
|              |       |          |
| <b>rGOc</b>  | O 1s  | 21.41    |
|              | C 1s  | 76.41    |
|              | Si 2p | 2.19     |
